# Supplementary material for: Optimised genome editing for precise DNA insertion and substitution using prime editors in zebrafish
Source: eLife. 2026 Jul 7;14:RP107475. doi: 10.7554/eLife.107475 (PMC13341114; doi:10.7554/eLife.107475)
Supplement: Figure 1—source data 1. [file elife-107475-fig1-data1.xlsx]

## Sheet: Figure 1_crbn
Sample	Precise prime edit	Imprecise prime edit	Indels	Wild type	Precision score
crbn_PE2_1	15.761	7.258	11.844	65.137	45.2084
crbn_PE2_2	7.195	10.494	2.772	79.538	35.1645
crbn_PE2_3	6.677	3.565	2.183	87.574	53.7384
crbn_PE2_4	3.798	1.529	2.1	92.573	51.1377
crbn_PE2_5	12.466	8.26	19.891	59.383	30.6916
crbn_PE2_6	6.967	8.907	5.324	78.801	32.8663
crbn_PE2_7	10.158	8.164	11.025	70.653	34.6134
crbn_PE2_8	10.86	10.081	7.508	71.549	38.1736
crbn_PE2_9	5.014	3.326	2.095	89.565	48.0498
crbn_PE2_10	5.078	2.809	5.507	86.607	37.9125
crbn_PE2_refolding_1	0.056	0.031	0.105	99.808	29.1667
crbn_PE2_refolding_2	2.507	1.839	3.611	92.043	31.5068
crbn_PE2_refolding_3	7.103	2.927	9.926	80.044	35.5933
crbn_PE2_refolding_4	5.577	5.722	6.78	81.921	30.8479
crbn_PE2_refolding_5	3.881	1.124	3.106	91.889	47.8486
crbn_PE2_refolding_6	2.478	2.825	2.298	92.399	32.601
crbn_PE2_refolding_7	12.461	4.93	12.941	69.668	41.082
crbn_PE2_refolding_8	3.481	11.228	2.387	82.903	20.3615
crbn_PE2_refolding_9	9.642	5.285	17.989	67.085	29.2927
crbn_PE2_refolding_10	5.049	2.272	4.255	88.423	43.6161
crbn_PEn_1	6.784	10.725	57.669	24.822	9.02392
crbn_PEn_2	3.748	9.073	17.793	69.386	12.2428
crbn_PEn_3	2.452	6.595	21.677	69.276	7.98073
crbn_PEn_4	0.072	0.084	0.466	99.378	11.5756
crbn_PEn_5	6.962	12.432	39.144	41.462	11.8931
crbn_PEn_6	3.652	6.375	14.423	75.55	14.9366
crbn_PEn_7	8.123	14.159	43.104	34.614	12.4231
crbn_PEn_8	6.259	10.532	29.699	53.51	13.4631
crbn_PEn_9	3.151	9.199	24.232	63.418	8.61353
crbn_PEn_10	2.734	5.467	15.079	76.72	11.744
crbn_PEn_refolding_1	1.417	3.185	42.407	52.991	3.01432
crbn_PEn_refolding_2	4.643	10.59	45.191	39.577	7.68403
crbn_PEn_refolding_3	4.37	15.09	55.591	24.949	5.82271
crbn_PEn_refolding_4	4.012	9.618	63.533	22.838	5.19938
crbn_PEn_refolding_5	2.393	5.996	24.575	67.036	7.25943
crbn_PEn_refolding_6	1.908	11.272	68.742	18.078	2.32904
crbn_PEn_refolding_7	0.618	1.471	6.54	91.37	7.1619
crbn_PEn_refolding_8	4.651	3.999	33.864	57.486	10.9399
crbn_PEn_refolding_9	2.811	3.504	33.803	59.882	7.00683
crbn_PEn_refolding_10	3.796	7.346	29.415	59.442	9.35967
