# Supplementary material for: Optimised genome editing for precise DNA insertion and substitution using prime editors in zebrafish
Source: eLife. 2026 Jul 7;14:RP107475. doi: 10.7554/eLife.107475 (PMC13341114; doi:10.7554/eLife.107475)
Supplement: Figure 2—source data 3. [file elife-107475-fig2-data3.xlsx]

## Sheet: Figure 2_ror2
Sample	Precise prime edit	Imprecise prime edit	Indels	Wild type	Precision score
PE2+pegRNA	0.425	0.163	0.134	99.278	58.8643
PEn+pegRNA	10.273	11.111	10.117	68.499	32.6117
PEn+springRNA	3.98	37.45	9.542	49.027	7.80821

## Sheet: Figure 2_figure supp 1_ror2
Sample	Precise prime edit	Imprecise prime edit	Indels	Wild type
PE2+pegRNA	0	0	0	44
PEn+pegRNA	2	3	5	30
PEn+springRNA	2	16	5	18
