# Supplementary material for: Optimised genome editing for precise DNA insertion and substitution using prime editors in zebrafish
Source: eLife. 2026 Jul 7;14:RP107475. doi: 10.7554/eLife.107475 (PMC13341114; doi:10.7554/eLife.107475)
Supplement: Figure 3—source data 1. [file elife-107475-fig3-data1.xlsx]

## Sheet: Figure 3_ror2 3 bp ins pegRNA
Sample	Precise prime edit	Imprecise prime edit	Indels	Wild type	Precision score
PE2 mRNA_1	1.131	0.18	0.252	98.437	72.3608
PE2 mRNA_2	1.197	0.255	0.31	98.238	67.9342
PE2 mRNA_3	1.06	0.243	0.217	98.48	69.7368
PE2 mRNA_4	1.565	0.283	0.292	97.861	73.1308
PE2 mRNA_5	1.421	0.243	0.365	97.971	70.0345
PE2 mRNA_6	1.303	0.184	0.238	98.275	75.5362
PE2 mRNA_7	0.946	0.169	0.283	98.602	67.6681
PE2 mRNA_8	1.718	0.213	0.268	97.801	78.1264
PE2 mRNA_9	1.087	0.183	0.298	98.431	69.324
PE2 mRNA_10	1.95	0.365	0.392	97.293	72.0355
PE2 RNP_1	13.603	5.408	4.953	76.036	56.7643
PE2 RNP_2	8.055	5.101	4.935	81.91	44.5249
PE2 RNP_3	14.958	7.198	7.138	70.705	51.0617
PE2 RNP_4	11.061	8.311	6.894	73.735	42.1115
PE2 RNP_5	19.324	10.559	8.72	61.396	50.0583
PE2 RNP_6	9.836	10.488	9.205	70.472	33.3096
PE2 RNP_7	6.616	8.076	9.016	76.293	27.9062
PE2 RNP_8	9.723	4.964	6.054	79.258	46.8782
PE2 RNP_9	7.469	7.038	13.56	71.932	26.6113
PE2 RNP_10	14.284	5.325	6.613	73.777	54.4733
PEn mRNA_1	17.884	16.613	16.646	48.857	34.9686
PEn mRNA_2	25.872	21.636	19.852	32.641	38.4086
PEn mRNA_3	17.686	15.337	10.803	56.175	40.355
PEn mRNA_4	7.471	9.36	7.779	75.391	30.3576
PEn mRNA_5	18.466	19.792	20.551	41.191	31.4
PEn mRNA_6	26.332	23.784	21.782	28.102	36.6241
PEn mRNA_7	19.521	19.395	20.099	40.986	33.078
PEn mRNA_8	16.164	16.143	18.02	49.673	32.1179
PEn mRNA_9	18.23	21.222	15.366	45.183	33.2555
PEn mRNA_10	20.118	21.683	20.226	37.973	32.4343
PEn RNP_1	25.685	21.178	37.744	15.393	30.358
PEn RNP_2	17.416	14.118	37.546	30.921	25.2113
PEn RNP_3	14.879	14.453	24.958	45.71	27.4065
PEn RNP_4	22.757	16.621	30.281	30.341	32.6691
PEn RNP_5	24.446	16.872	32.989	25.694	32.8987
PEn RNP_6	14.318	11.912	31.438	42.332	24.8283
PEn RNP_7	20.789	14.277	39.668	25.267	27.8173
PEn RNP_8	17.801	17.782	39.07	25.347	23.845
PEn RNP_9	29.383	18.564	41.03	11.023	33.0231
PEn RNP_10	17.866	19.041	36.715	26.378	24.2672

## Sheet: Figure 3_ror2 3 bp ins HDR
Sample	HDR	Imprecise HDR	Indels	Wild type
Donor sense_1	2.284	29.66	13.706	54.35
Donor sense_2	15.111	24.071	43.826	16.992
Donor sense_3	2.967	75.524	13.622	7.887
Donor sense_4	2.545	9.075	83.207	5.173
Donor sense_5	4.753	27.034	65.907	2.306
Donor sense_6	1.988	55.606	34.18	8.226
Donor sense_7	2.895	57.392	34.321	5.392
Donor sense_8	6.561	30.39	28.092	34.957
Donor sense_9	1.24	53.481	38.711	6.568
Donor sense_10	1.631	14.352	73.383	10.633
Donor antisense_1	4.249	17.166	70.311	8.274
Donor antisense_2	1.261	45.521	27.037	26.182
Donor antisense_3	1.04	27.535	62.922	8.503
Donor antisense_4	1.995	23.201	65.902	8.901
Donor antisense_5	1.244	30.786	21.851	46.119
Donor antisense_6	6.523	50.607	34.678	8.192
Donor antisense_7	8.219	25.665	50.764	15.352
Donor antisense_8	5.383	30.496	60.448	3.673
Donor antisense_9	8.156	32.203	50.116	9.526

## Sheet: Figure 3_ror2 springRNA
Sample	Precise prime edit	Scaffold incorporation (imprecise prime edit with scaffold)	Imprecise prime edit without scaffold	Indels	Wild type	Precision score
PEn mRNA_1	3.803	13.287	15.679	6.985	60.245	9.56633
PEn mRNA_2	6.299	21.577	29.504	13.103	29.517	8.93691
PEn mRNA_3	7.182	18.624	30.092	14.501	29.601	10.2018
PEn mRNA_4	4.404	12.294	16.461	7.166	59.675	10.9213
PEn mRNA_5	6.372	20.804	27.365	12.59	32.869	9.49189
PEn mRNA_6	4.64	13.867	21.768	11.376	48.349	8.98337
PEn mRNA_7	2.651	11.06	13.08	5.944	67.265	8.09837
PEn mRNA_8	9.56	20.917	42.12	22.051	5.352	10.1006
PEn mRNA_9	7.557	22.338	33.434	15.75	20.921	9.55627
PEn mRNA_10	6.635	19.059	28.468	11.739	34.099	10.0681
PEn RNP_1	7.627	14.928	31.474	29.588	16.383	9.12135
PEn RNP_2	8.155	14.07	33.834	20.121	23.82	10.7049
PEn RNP_3	8.016	14.048	29.443	26.67	21.823	10.2537
PEn RNP_4	9.859	14.343	33.107	30.072	12.618	11.2828
PEn RNP_5	6.099	12.968	23.966	27.719	29.248	8.62025
PEn RNP_6	5.237	10.442	21.098	17.043	46.18	9.73058
PEn RNP_7	9.286	5.597	13.996	18.432	52.689	19.6276
PEn RNP_8	6.407	16.249	33.306	26.649	17.389	7.75563
PEn RNP_9	7.861	9.47	25.566	34.161	22.941	10.2014
PEn RNP_10	7.469	18.618	32.823	25.279	15.811	8.87171
PEn mRNA abasic spacer_1	7.418	0.081	11.952	15.57	64.979	21.1816
PEn mRNA abasic spacer_2	9.456	0.19	13.027	17.096	60.231	23.7773
PEn mRNA abasic spacer_3	5.394	0.118	8.626	10.226	75.636	22.1392
PEn mRNA abasic spacer_4	5.38	0.106	7.407	9.266	77.842	24.2791
PEn mRNA abasic spacer_5	6.896	0.129	9.139	9.774	74.063	26.5865
PEn mRNA abasic spacer_6	3.834	0.199	8.509	10.007	77.451	17.003
PEn mRNA abasic spacer_7	6.175	0.108	11.65	15.926	66.141	18.2374
PEn mRNA abasic spacer_8	2.361	0.126	3.658	4.685	89.171	21.8006
PEn mRNA abasic spacer_9	3.277	0.052	4.695	6.538	85.438	22.5038
PEn mRNA abasic spacer_10	7.554	0.15	12.834	17.847	61.615	19.6796
PEn RNP abasic spacer_1	5.529	0.293	44.433	17.186	32.56	8.19828
PEn RNP abasic spacer_2	4.695	0.174	10.861	26.473	57.797	11.1248
PEn RNP abasic spacer_3	11.736	0.135	8.251	26.092	53.788	25.3949
PEn RNP abasic spacer_4	4.284	0.182	8.922	17.353	69.26	13.9358
PEn RNP abasic spacer_5	2.842	0.038	6.276	14.575	76.268	11.9759
PEn RNP abasic spacer_6	3.77	0.167	16.134	21.219	58.71	9.13054
PEn RNP abasic spacer_7	5.61	0.244	10.95	17.61	65.586	16.3015
PEn RNP abasic spacer_8	6.436	0.773	6.925	16.258	69.608	21.1766
PEn RNP abasic spacer_9	3.397	0.075	14.369	15.593	66.566	10.1603

## Sheet: Figure 3_adgrf3b 3 bp ins
Sample	Precise prime edit	Scaffold incorporation (imprecise prime edit with scaffold)	Imprecise prime edit without scaffold	Indels	Wild type	Precision score
PE2 mRNA+pegRNA_1	11.64	0.009	0.482	0.195	87.673	94.4345
PE2 mRNA+pegRNA_2	14.847	0.019	0.767	0.233	84.134	93.5775
PE2 mRNA+pegRNA_3	15.039	0.013	0.816	0.387	83.744	92.5192
PE2 mRNA+pegRNA_4	14.554	0.03	0.71	0.24	84.466	93.6913
PE2 mRNA+pegRNA_5	13.587	0.071	0.784	0.271	85.286	92.3469
PE2 mRNA+pegRNA_6	11.035	0.025	0.722	0.14	88.078	92.56
PE2 mRNA+pegRNA_7	14.269	0.027	0.667	0.51	84.526	92.2187
PE2 mRNA+pegRNA_8	13.015	0.027	0.891	0.518	85.549	90.063
PE2 mRNA+pegRNA_9	11.049	0.02	0.63	0.274	88.026	92.2826
PE2 mRNA+pegRNA_10	12.359	0.01	0.51	0.342	86.778	93.4801
PE2 RNP+pegRNA_1	21.188	5.364	18.713	9.181	45.553	38.9156
PE2 RNP+pegRNA_2	31.813	1.448	17.572	11.036	38.132	51.4199
PE2 RNP+pegRNA_3	16.667	0.96	13.239	16.721	52.413	35.0243
PE2 RNP+pegRNA_4	32.984	1.539	16.092	8.939	40.447	55.385
PE2 RNP+pegRNA_5	18.543	1.533	12.686	9.726	57.513	43.6429
PE2 RNP+pegRNA_6	37.45	1.752	12.05	13.04	35.708	58.2499
PE2 RNP+pegRNA_7	25.915	0.424	12.02	6.513	55.128	57.7532
PE2 RNP+pegRNA_8	28.932	2.647	9.174	15.587	43.659	51.3525
PE2 RNP+pegRNA_9	9.628	0.787	10.288	9.989	69.307	31.3697
PE2 RNP+pegRNA_10	17.818	2.251	8.643	16.397	54.891	39.4999
PEn mRNA+pegRNA_1	29.516	0.716	13.859	15.069	40.84	49.8918
PEn mRNA+pegRNA_2	37.125	0.494	17.138	34.41	10.833	41.6354
PEn mRNA+pegRNA_3	39.439	0.377	14.697	42.423	3.064	40.6856
PEn mRNA+pegRNA_4	19.013	0.665	7.861	11.333	61.128	48.9118
PEn mRNA+pegRNA_5	44.198	0.512	12.791	31.707	10.792	49.5449
PEn mRNA+pegRNA_6	44.452	0.515	14.48	28.415	12.138	50.593
PEn mRNA+pegRNA_7	24.749	0.645	11.733	15.589	47.284	46.9478
PEn mRNA+pegRNA_8	9.336	0.291	5.59	5.313	79.471	45.4749
PEn mRNA+pegRNA_9	24.192	0.66	10.211	20.122	44.815	43.838
PEn mRNA+pegRNA_10	1.077	0.06	8.817	21.541	68.505	3.41959
PEn RNP+pegRNA_1	23.942	0.157	19.108	55.104	1.689	24.3533
PEn RNP+pegRNA_2	21.078	0.172	11.863	60.782	6.107	22.4485
PEn RNP+pegRNA_3	21.642	0.334	11.1	56.114	10.809	24.2651
PEn RNP+pegRNA_4	24.682	0.168	18.109	56.114	0.927	24.9129
PEn RNP+pegRNA_5	29.497	0.149	16.03	52.99	1.333	29.8958
PEn RNP+pegRNA_6	29.02	0.911	12.749	40.53	16.79	34.8756
PEn RNP+pegRNA_7	29.964	0.175	9.048	55.492	5.322	31.648
PEn RNP+pegRNA_8	16.567	0.088	30.787	52.171	0.387	16.6314
PEn RNP+pegRNA_9	23.893	0.121	11.338	63.852	0.796	24.0847
PEn RNP+pegRNA_10	40.722	1.793	17.054	38.305	2.125	41.6066
PEn mRNA+springRNA_1	4.608	38.888	21.551	30.036	4.917	4.84629
PEn mRNA+springRNA_2	2.157	29.169	15.082	23.368	30.224	3.09132
PEn mRNA+springRNA_3	3.757	28.472	20.202	36.765	10.804	4.21207
PEn mRNA+springRNA_4	5.067	36.746	19.313	20.929	17.944	6.17513
PEn mRNA+springRNA_5	5.49	34.678	15.07	28.277	16.485	6.57367
PEn mRNA+springRNA_6	3.671	43.05	15.122	31.179	6.979	3.94638
PEn mRNA+springRNA_7	5.185	43.114	18.763	28.302	4.636	5.43706
PEn mRNA+springRNA_8	3.371	33.272	19.324	35.165	8.867	3.69903
PEn mRNA+springRNA_9	3.654	32.742	16.176	23.055	24.373	4.83161
PEn mRNA+springRNA_10	2.603	27.675	16.339	26.854	26.529	3.54289
PEn RNP+springRNA_1	0.385	13.699	46.115	35.725	4.076	0.401359
PEn RNP+springRNA_2	1.483	28.49	13.554	55.728	0.745	1.49413
PEn RNP+springRNA_3	1.243	20.825	20.581	52.44	4.91	1.3072
PEn RNP+springRNA_4	0.512	26.549	17.049	54.292	1.598	0.520315
PEn RNP+springRNA_5	1.95	11.577	14.144	67.733	4.595	2.04394
PEn RNP+springRNA_6	1.559	25.483	20.391	51.354	1.213	1.57814
PEn RNP+springRNA_7	1.573	20.073	17.787	53.342	7.224	1.6955
PEn RNP+springRNA_8	3.76	14.066	38.536	42.56	1.078	3.80097
PEn RNP+springRNA_9	14.861	10.801	25.559	47.911	0.868	14.9911
PEn RNP+springRNA_10	2.06	47.595	3.225	46.06	1.06	2.08207
PEn RNP+springRNA+spacer_1	1.948	7.398	14.995	73.146	2.514	1.99822
PEn RNP+springRNA+spacer_2	0.292	2.627	30.315	66.446	0.32	0.292937
PEn RNP+springRNA+spacer_3	2.938	7.185	23.731	56.776	9.371	3.24175
PEn RNP+springRNA+spacer_4	7.756	12.499	24.179	46.633	8.933	8.51681
PEn RNP+springRNA+spacer_5	4.467	10.706	20.118	54.06	10.65	4.99938
PEn RNP+springRNA+spacer_6	2.521	5.022	35.977	54.565	1.915	2.57022
PEn RNP+springRNA+spacer_7	2.201	6.19	14.696	52.005	24.908	2.93107
PEn RNP+springRNA+spacer_8	5.096	9.53	17.374	60.8	7.201	5.49138
PEn RNP+springRNA+spacer_9	1.981	3.821	14.127	77.753	2.318	2.02801
PEn RNP+springRNA+spacer_10	10.73	5.974	21.017	60.082	2.197	10.971

## Sheet: Figure 3_adgrf3b 12 bp ins
Sample	Precise prime edit	Scaffold incorporation (imprecise prime edit with scaffold)	Imprecise prime edit without scaffold	Indels	Wild type	Precision score
PE2 mRNA+pegRNA_1	0.096	0	0.037	0.373	99.494	18.9723
PE2 mRNA+pegRNA_2	0.12	0	0.087	0.393	99.399	20
PE2 mRNA+pegRNA_3	0.126	0	0.048	0.637	99.188	15.5364
PE2 mRNA+pegRNA_4	0.097	0	0.013	0.774	99.116	10.9729
PE2 mRNA+pegRNA_5	0.119	0	0.043	0.6	99.238	15.6168
PE2 mRNA+pegRNA_6	0.056	0	0.202	0.696	99.047	5.87002
PE2 mRNA+pegRNA_7	0.13	0	0.07	1.002	98.797	10.8153
PE2 mRNA+pegRNA_8	0.138	0	0.097	1.775	97.99	6.86567
PE2 mRNA+pegRNA_9	0.08	0	0.037	0.874	99.009	8.07265
PE2 mRNA+pegRNA_10	0.112	0	0.024	0.848	99.016	11.3821
PE2 RNP+pegRNA_1	1.949	0.807	1.201	15.842	80.202	9.84393
PE2 RNP+pegRNA_2	1.555	0	1.39	11.397	85.657	10.8423
PE2 RNP+pegRNA_3	2.783	0.073	1.905	7.964	87.275	21.8703
PE2 RNP+pegRNA_4	2.113	0.007	5.36	19.121	73.4	7.94331
PE2 RNP+pegRNA_5	1.658	0.03	3.246	8.216	86.85	12.6084
PE2 RNP+pegRNA_6	1.8	0.187	2.77	18.33	76.913	7.7966
PE2 RNP+pegRNA_7	2.887	0.155	0.689	9.369	86.9	22.0382
PE2 RNP+pegRNA_8	1.018	0.03	1.945	9.46	87.547	8.17474
PE2 RNP+pegRNA_9	2.904	0.103	3.306	27.306	66.382	8.63797
PE2 RNP+pegRNA_10	1.076	0.139	2.088	9.594	87.103	8.34303
PEn mRNA+pegRNA_1	3.949	0.037	5.224	34.817	55.973	8.9695
PEn mRNA+pegRNA_2	2.196	0.009	1.612	14.584	81.599	11.9341
PEn mRNA+pegRNA_3	1.963	0.01	2.174	19.248	76.604	8.39068
PEn mRNA+pegRNA_4	1.317	0.013	1.677	8.943	88.05	11.0209
PEn mRNA+pegRNA_5	1.487	0.005	1.881	17.558	79.069	7.1043
PEn mRNA+pegRNA_6	2.273	0.028	2.178	18.273	77.248	9.99033
PEn mRNA+pegRNA_7	0.691	0.016	0.721	3.799	94.773	13.2198
PEn mRNA+pegRNA_8	2.925	0.016	3.803	31.464	61.791	7.65546
PEn mRNA+pegRNA_9	2.117	0.019	3.005	22.085	72.774	7.77566
PEn mRNA+pegRNA_10	0.205	0.007	6.964	88.346	4.477	0.21461
PEn RNP+pegRNA_1	8.263	0.064	9.198	65.146	17.329	9.99504
PEn RNP+pegRNA_2	7.094	0.168	7.735	53.019	31.985	10.4299
PEn RNP+pegRNA_3	7.837	0.764	7.371	75.82	8.207	8.53778
PEn RNP+pegRNA_4	7.124	0.044	7.898	79.75	5.184	7.5135
PEn RNP+pegRNA_5	7.392	0.183	8.383	66.884	17.158	8.92301
PEn RNP+pegRNA_6	11.551	0.016	7.703	74.941	5.789	12.2608
PEn RNP+pegRNA_7	5.397	0.094	5.301	78.291	10.917	6.05839
PEn RNP+pegRNA_8	11.558	0.046	11.565	67.634	9.196	12.7287
PEn RNP+pegRNA_9	6.554	0.065	11.479	65.599	16.302	7.83063
PEn RNP+pegRNA_10	10.504	0.157	11.528	59.711	18.1	12.8254
PEn mRNA+springRNA_1	1.319	8.014	14.951	44.586	31.13	1.9152
PEn mRNA+springRNA_2	0.512	6.937	14.577	26.237	51.738	1.06085
PEn mRNA+springRNA_3	0.561	11.284	16.833	54.571	16.75	0.673882
PEn mRNA+springRNA_4	0.651	8.007	19.702	44.844	26.796	0.889296
PEn mRNA+springRNA_5	0.615	14.128	18.305	56.941	10.011	0.683417
PEn mRNA+springRNA_6	0.68	14.815	18.385	50.123	15.998	0.809495
PEn mRNA+springRNA_7	0.337	5.865	11.362	24.175	58.261	0.807398
PEn mRNA+springRNA_8	1.101	15.749	28.602	52.111	2.438	1.1285
PEn mRNA+springRNA_9	0.773	9.567	21.701	43.331	24.628	1.02558
PEn mRNA+springRNA_10	0.691	5.825	8.897	26.616	57.972	1.6441
PEn RNP+springRNA_1	2.754	10.593	10	74.753	1.9	2.80734
PEn RNP+springRNA_2	1.453	9.23	11.08	74.763	3.473	1.50529
PEn RNP+springRNA_3	0.695	5.91	21.512	67.422	4.462	0.727452
PEn RNP+springRNA_4	0.896	18.258	15.911	63.285	1.651	0.911032
PEn RNP+springRNA_5	0.197	6.592	14.111	77.215	1.885	0.200785
PEn RNP+springRNA_6	0.361	17.859	13.573	62.334	5.873	0.383524
PEn RNP+springRNA_7	0.981	4.444	12.948	76.77	4.856	1.03108
PEn RNP+springRNA_8	0.356	7.556	7.933	81.859	2.296	0.364366
PEn RNP+springRNA_9	0.463	7.907	10.792	74.938	5.899	0.49203
PEn RNP+springRNA_10	1.262	7.874	9.924	75.43	5.51	1.33559
PEn RNP+springRNA+spacer_1	0.24	0.289	1.807	9.676	87.987	1.998
PEn RNP+springRNA+spacer_2	0.193	0.979	2.354	15.724	80.75	1.0026
PEn RNP+springRNA+spacer_3	0.324	0.155	1.748	11.14	86.632	2.42388
PEn RNP+springRNA+spacer_4	0.156	0.248	1.903	12.481	85.213	1.05491
PEn RNP+springRNA+spacer_5	0.17	0.178	1.856	10.083	87.713	1.38358
PEn RNP+springRNA+spacer_6	0.117	0.198	2.739	13.879	83.067	0.690958
PEn RNP+springRNA+spacer_7	0.221	0.625	1.88	9.854	87.42	1.75676
PEn RNP+springRNA+spacer_8	0.487	0.245	1.443	13.623	84.202	3.08267
PEn RNP+springRNA+spacer_9	0.209	0.262	2.402	10.921	86.207	1.51515
PEn RNP+springRNA+spacer_10	0.321	1.178	4.493	9.605	84.404	2.05809

## Sheet: Figure 3_figure supp 1_ror2 G>A
Sample	Precise prime edit	Imprecise prime edit	Indels	Wild type	Precision score
PE2_1	4.1	1.431	7.473	86.996	31.5288
PE2_2	0.788	0.503	2.559	96.15	20.4675
PE2_3	1.737	0.661	3.1	94.502	31.5933
PE2_4	2.222	2.395	2.595	92.787	30.8098
PE2_5	1.138	0.476	1.654	96.733	34.8225
PE2_6	0.71	1.583	3.233	94.474	12.8484
PE2_7	4.015	4.307	4.773	86.906	30.6606
PE2_8	2.158	1.747	4.583	91.512	25.4241
PE2_9	1.383	0.53	6.59	91.497	16.2648
PE2_10	1.443	0.399	5.485	92.672	19.6943
PEn_1	3.062	0.988	18.395	77.554	13.6422
PEn_2	2.86	1.739	19.36	76.041	11.9371
PEn_3	3.486	1.443	22.637	72.433	12.646
PEn_4	4.601	1.872	27.378	66.149	13.5919
PEn_5	3.918	2.558	17.776	75.748	16.1554
PEn_6	3.467	1.162	17.59	77.782	15.6038
PEn_7	4.884	1.924	21.584	71.608	17.202
PEn_8	3.909	1.421	16.137	78.533	18.2093
PEn_9	3.803	0.98	20.939	74.278	14.785
PEn_10	3.391	0.838	19.788	75.984	14.1192

## Sheet: Figure 3_figure supp 1_off-targ
Sample	Off-target 1 overall editing	Off-target 2 overall editing	Off-target 3 overall editing
Cas9+gRNA HDR_1	0	0.00638937	0.0128419
Cas9+gRNA HDR_2	0.00274914	0	0.00216188
Cas9+gRNA HDR_3	0.00582683	0.00214114	0.00697026
Cas9+gRNA HDR_4	0.00264753	0.00852588	0.0132065
Cas9+gRNA HDR_5	0	0.00645106	0.00507074
Cas9+gRNA HDR_6	0	0.00451162	0.00252417
Cas9+gRNA HDR_7	0.00315786	0.00453114	0.00743937
Cas9+gRNA HDR_8	0.00310665	0.00247598	0.0111916
Cas9+gRNA HDR_9	0	0.00669987	0.00513795
Cas9+gRNA HDR_10	0.00272598	0.00439039	0.0130353
PE2+pegRNA_1	0	0.0041272	0.0130443
PE2+pegRNA_2	0	0.0122312	0.00260173
PE2+pegRNA_3	0.00237338	0.00420389	0
PE2+pegRNA_4	0.00260403	0.00700117	0.00442233
PE2+pegRNA_5	0	0.00803697	0.00644039
PE2+pegRNA_6	0.00281849	0	0.00707747
PE2+pegRNA_7	0	0.00882457	0
PE2+pegRNA_8	0	0.00401865	0.00729749
PE2+pegRNA_9	0.00537779	0.00661638	0.00549707
PE2+pegRNA_10	0.00249209	0.00427077	0.0158806
PEn+pegRNA_1	0	0.00389226	0.0154029
PEn+pegRNA_2	0.00244075	0.0106433	0.00446818
PEn+pegRNA_3	0.00243067	0.00408814	0.00452264
PEn+pegRNA_4	0	0.00413873	0.00992925
PEn+pegRNA_5	0.00252595	0.00859494	0.00221122
PEn+pegRNA_6	0	0.00652798	0.00648144
PEn+pegRNA_7	0.00280489	0.00236485	0.00975063
PEn+pegRNA_8	0.00754053	0.00848248	0.00942396
PEn+pegRNA_9	0	0.00682283	0.00298588
PEn+pegRNA_10	0.00258505	0.00872201	0.00678948
PEn+springRNA_1	0	0.00634129	0.00674567
PEn+springRNA_2	0.0023488	0.0112461	0.0232498
PEn+springRNA_3	0	0.00374637	0.00930254
PEn+springRNA_4	0.00258365	0.00193353	0.0044601
PEn+springRNA_5	0.00252774	0.00947077	0.00233432
PEn+springRNA_6	0.00242618	0.00190024	0.00243623
PEn+springRNA_7	0	0.00376733	0.0122618
PEn+springRNA_8	0.0080186	0.0086642	0.00857854
PEn+springRNA_9	0.00500914	0.00785916	0.00938681
PEn+springRNA_10	0.00252979	0.00587268	0.0133833
