# Supplementary material for: Optimised genome editing for precise DNA insertion and substitution using prime editors in zebrafish
Source: eLife. 2026 Jul 7;14:RP107475. doi: 10.7554/eLife.107475 (PMC13341114; doi:10.7554/eLife.107475)
Supplement: Figure 4—source data 1. [file elife-107475-fig4-data1.xlsx]

## Sheet: Figure 4_Total length
Sample	Total length (μm)
Wild type_1	3869.4
Wild type_2	4029.39
Wild type_3	3890.9
Wild type_4	4085.88
Wild type_5	3984.08
Wild type_6	3861.99
Wild type_7	3915.31
Wild type_8	3972.55
Wild type_9	4006.8
Wild type_10	3877.26
ror2W722X_1	3898.19
ror2W722X_2	3995.01
ror2W722X_3	3827.77
ror2W722X_4	3841.87
ror2W722X_5	3855.94
ror2W722X_6	4017.91
ror2W722X_7	4039.08
ror2W722X_8	3903.39
ror2W722X_9	4086.97
ror2W722X_10	3924.64
MZ ror2W722X_1	3410.83
MZ ror2W722X_2	3390.69
MZ ror2W722X_3	3579.3
MZ ror2W722X_4	3504.93
MZ ror2W722X_5	3567.77
MZ ror2W722X_6	3664.9
MZ ror2W722X_7	3462.1
MZ ror2W722X_8	3562.14
MZ ror2W722X_9	3450.88
MZ ror2W722X_10	3659.42

## Sheet: Figure 4_Jaw morphology
Sample	d1	d2	d3	d4	d5	d6	(d1+d2)/2d3	(d4+d5)/2d6
Wild type_1	9.52	9.46	13.18	24.62	25.99	16.17	0.72003	1.56494
Wild type_2	9.17	9.97	12.64	27.17	27.15	14.83	0.75712	1.83142
Wild type_3	8.02	8.44	12.08	23.61	23.3	15.62	0.681291	1.5016
Wild type_4	9.19	9.16	13.55	26.9	26.36	17.29	0.677122	1.5402
Wild type_5	9.78	9.88	13.3	26.81	27.47	15.63	0.739098	1.7364
MZ ror2W722X_1	8.54	8.66	15.12	22.81	23.9	21.06	0.568783	1.10897
MZ ror2W722X_2	8.93	9.08	16.67	21.85	21.73	24.42	0.540192	0.892301
MZ ror2W722X_3	9.29	9.32	14.96	25.12	24.7	17.88	0.621992	1.39318
MZ ror2W722X_4	8.75	8.77	14.34	25.39	26.68	20.84	0.610879	1.24928
MZ ror2W722X_5	9.04	9.28	15.27	24.53	24.26	20.53	0.599869	1.18826
