# Supplementary material for: Optimised genome editing for precise DNA insertion and substitution using prime editors in zebrafish
Source: eLife. 2026 Jul 7;14:RP107475. doi: 10.7554/eLife.107475 (PMC13341114; doi:10.7554/eLife.107475)
Supplement: Figure 5—source data 1. [file elife-107475-fig5-data1.xlsx]

## Sheet: Figure 5_smyhc1 amplicon seq
Sample	Precise prime edit	Imprecise prime edit	Indels	Wild type	Precision score
PBS 10 nt_1	6.174	5.839	81.083	6.904	6.63186
PBS 10 nt_2	4.046	2.505	89.452	3.997	4.21445
PBS 10 nt_3	13.452	3.968	79.381	3.199	13.8966
PBS 10 nt_4	7.033	5.704	66.202	21.061	8.90941
PBS 10 nt_5	8.115	5.372	72.636	13.878	9.42257
PBS 10 nt_6	9.598	6.761	74.98	8.661	10.5081
PBS 10 nt_7	7.991	7.991	79.921	4.097	8.33238
PBS 10 nt_8	11.777	4.824	54.339	29.059	16.6014
PBS 10 nt_9	6.999	2.829	86.654	3.518	7.2542
PBS 10 nt_10	9.978	6.899	71.503	11.62	11.2899
PBS 13 nt_1	3.686	2.278	77.279	16.756	4.428
PBS 13 nt_2	1.14	5.913	79.856	13.091	1.31172
PBS 13 nt_3	4.459	1.323	44.294	49.924	8.90447
PBS 13 nt_4	0.798	1.614	46.542	51.046	1.6301
PBS 13 nt_5	1.653	19.658	72.123	6.565	1.76916
PBS 13 nt_6	1.641	4.431	77.676	16.252	1.95945
PBS 13 nt_7	2.67	1.64	70.867	24.823	3.55162
PBS 13 nt_8	14.246	2.178	63.333	20.242	17.8618
PBS 13 nt_9	0.948	3.871	61.584	33.597	1.42765

## Sheet: Figure 5_smyhc1 F1 embryo
Founder	Nuclear GFP	Cytoplasmic GFP	No GFP
Founder_1	8	21	33
Founder_2	66	105	194
Founder_3	9	100	178
Founder_4	13	251	552
Founder_5	0	108	116
Founder_6	0	40	897

## Sheet: Figure 5_figure supp 2_wls
Sample	Precise prime edit	Imprecise prime edit	Indels	Wild type	Precision score
Cas9+gRNA HDR Donor DNA (+)_1	0.692	4.993	46.756	47.559	1.31958
Cas9+gRNA HDR Donor DNA (+)_2	0.805	5.599	65.611	27.985	1.11782
Cas9+gRNA HDR Donor DNA (+)_3	0.898	38.31	51.468	9.323	0.990339
Cas9+gRNA HDR Donor DNA (+)_4	2.307	6.884	79.361	11.448	2.60525
Cas9+gRNA HDR Donor DNA (+)_5	1.039	7.939	40.802	50.219	2.08718
Cas9+gRNA HDR Donor DNA (+)_6	1.235	5.095	67.469	26.201	1.67346
Cas9+gRNA HDR Donor DNA (+)_7	2.344	16.212	58.323	23.122	3.04895
Cas9+gRNA HDR Donor DNA (+)_8	1.319	9.605	30.778	58.298	3.16292
Cas9+gRNA HDR Donor DNA (+)_9	0.971	2.63	51.46	44.94	1.7635
Cas9+gRNA HDR Donor DNA (+)_10	2.828	4.254	78.885	14.034	3.28963
Cas9+gRNA HDR Donor DNA (−)_1	0.349	8.217	75.634	15.801	0.414489
Cas9+gRNA HDR Donor DNA (−)_2	1.061	7.882	64.516	26.54	1.44434
Cas9+gRNA HDR Donor DNA (−)_3	0.583	3.461	26.14	69.817	1.93149
Cas9+gRNA HDR Donor DNA (−)_4	0.399	6.615	66.984	26.001	0.539204
Cas9+gRNA HDR Donor DNA (−)_5	0.327	7.225	44.824	47.624	0.624332
Cas9+gRNA HDR Donor DNA (−)_6	0.329	9.529	41.001	49.141	0.646886
Cas9+gRNA HDR Donor DNA (−)_7	0.754	12.944	58.567	27.734	1.04338
Cas9+gRNA HDR Donor DNA (−)_8	0.142	4.227	34.226	61.405	0.367923
Cas9+gRNA HDR Donor DNA (−)_9	0.227	3.706	42.424	53.643	0.489678
Cas9+gRNA HDR Donor DNA (−)_10	0.427	6.755	64.106	28.711	0.598979
PEn+springRNA_1	3.768	5.904	46.403	43.925	6.71957
PEn+springRNA_2	0.89	4.122	44.552	50.435	1.79566
PEn+springRNA_3	1.526	5.576	39.326	53.572	3.28681
PEn+springRNA_4	1.046	4.695	48.641	45.618	1.92343
PEn+springRNA_5	1.193	3.532	42.905	52.37	2.50472
PEn+springRNA_6	1.193	2.546	45.956	50.305	2.40064
PEn+springRNA_7	2.251	7.749	50.738	39.262	3.70608
PEn+springRNA_8	0.67	3.013	27.91	68.408	2.12072
PEn+springRNA_9	1.172	2.469	30.785	65.573	3.4044
PEn+springRNA_10	0.636	2.93	42.402	54.032	1.38357
