# Supplementary material for: Optimised genome editing for precise DNA insertion and substitution using prime editors in zebrafish
Source: eLife. 2026 Jul 7;14:RP107475. doi: 10.7554/eLife.107475 (PMC13341114; doi:10.7554/eLife.107475)
Supplement: Supplementary file 1. [file elife-107475-supp1.xlsx]

## Sheet: pegRNA and springRNA
Supplementary Table 1: The sequences of the pegRNA, springRNA and donor DNA used in the study
Name	Sequence	Spacer	Length (nt)	PBS length (nt)	Insertion (nt)	Homology arm (nt)
crbn pegRNA	mU*mU*mU*CUUUUCUCAGGUAUGCGGUUUUAGAGCUAGAAAUAGCAAGUUAAAAUAAGGCUAGUCCGUUAUCAACUUGAAAAAGUGGCACCGAGUCGGUGCAGCAACCGUCCAGGCAUACCUGAGA*mA*mA*mA	UUUCUUUUCUCAGGUAUGCG	124	13	0	15
ror2 3 bp insertion pegRNA	mA*mU*mC*AUCGUGUAUAUCCAGGCGUUUUAGAGCUAGAAAUAGCAAGUUAAAAUAAGGCUAGUCCGUUAUCAACUUGAAAAAGUGGCACCGAGUCGGUGCCGACUGUCCAGCCUGAUGGAUAUACA*mC*mG*mA	AUCAUCGUGUAUAUCCAGGC	125	13	3	13
ror2 3 bp insertion springRNA	mA*mU*mC*AUCGUGUAUAUCCAGGCGUUUUAGAGCUAGAAAUAGCAAGUUAAAAUAAGGCUAGUCCGUUAUCAACUUGAAAAAGUGGCACCGAGUCGGUGCUGAUGGAUAUACA*mC*mG*mA	AUCAUCGUGUAUAUCCAGGC	112	13	3	0
ror2 3 bp insertion abasic springRNA	mA*mU*mC*AUCGUGUAUAUCCAGGCGUUUUAGAGCUAGAAAUAGCAAGUUAAAAUAAGGCUAGUCCGUUAUCAACUUGAAAAAGUGGCACCGAGUCGGUGC(rSpacer)UGAUGGAUAUACA*mC*mG*mA	AUCAUCGUGUAUAUCCAGGC	112	13	3	0
ror2 substitution pegRNA	mG*mC*mC*CAGACGACUGUCCAGCCGUUUUAGAGCUAGAAAUAGCAAGUUAAAAUAAGGCUAGUCCGUUAUCAACUUGAAAAAGUGGCACCGAGUCGGUGCAUCGUGUAUAUUCAGGCUGGACAGUCG*mU*mC*mU	GCCCAGACGACUGUCCAGCC	126	13	0	17
adgrf3b 3 bp insertion pegRNA	mG*mU*mG*UAUGGCAGAUGUCCAGGUUUUAGAGCUAGAAAUAGCAAGUUAAAAUAAGGCUAGUCCGUUAUCAACUUGAAAAAGUGGCACCGAGUCGGUGCGCUUCGUCGCCUCUGAAAGACAUCUGCC*mA*mU*mA	GUGUAUGGCAGAUGUCCAG	126	13	3	15
adgrf3b 3 bp insertion springRNA	mG*mU*mG*UAUGGCAGAUGUCCAGGUUUUAGAGCUAGAAAUAGCAAGUUAAAAUAAGGCUAGUCCGUUAUCAACUUGAAAAAGUGGCACCGAGUCGGUGCAAAGACAUCUGCC*mA*mU*mA	GUGUAUGGCAGAUGUCCAG	111	13	3	0
adgrf3b 3 bp insertion abasic springRNA	mG*mU*mG*UAUGGCAGAUGUCCAGGUUUUAGAGCUAGAAAUAGCAAGUUAAAAUAAGGCUAGUCCGUUAUCAACUUGAAAAAGUGGCACCGAGUCGGUGC(rSpacer)AAAGACAUCUGCC*mA*mU*mA	GUGUAUGGCAGAUGUCCAG	111	13	3	0
adgrf3b 12 bp insertion pegRNA	mG*mU*mG*UAUGGCAGAUGUCCAGGUUUUAGAGCUAGAAAUAGCAAGUUAAAAUAAGGCUAGUCCGUUAUCAACUUGAAAAAGUGGCACCGAGUCGGUGCGCUUCGUCGCCUCUGAACAAAGUACUAGACAUCUGCC*mA*mU*mA	GUGUAUGGCAGAUGUCCAG	135	13	12	15
adgrf3b 12 bp insertion springRNA	mG*mU*mG*UAUGGCAGAUGUCCAGGUUUUAGAGCUAGAAAUAGCAAGUUAAAAUAAGGCUAGUCCGUUAUCAACUUGAAAAAGUGGCACCGAGUCGGUGCAACAAAGUACUAGACAUCUGCC*mA*mU*mA	GUGUAUGGCAGAUGUCCAG	120	13	12	0
adgrf3b 12 bp insertion abasic springRNA (DNA spacer)	mG*mU*mG*UAUGGCAGAUGUCCAGGUUUUAGAGCUAGAAAUAGCAAGUUAAAAUAAGGCUAGUCCGUUAUCAACUUGAAAAAGUGGCACCGAGUCGGUGC/idSp/AACAAAGUACUAGACAUCUGCC*mA*mU*mA	GUGUAUGGCAGAUGUCCAG	120	13	12	0
smyhc1:gfp 30 bp insertion pegRNA (short)	mC*mU*mC*CUCGCCCUUGCUCACCAGUUUUAGAGCUAGAAAUAGCAAGUUAAAAUAAGGCUAGUCCGUUAUCAACUUGAAAAAGUGGCACCGAGUCGGUGCAGUCGCCACCAUGGUGCCUGCUGCUAAGAGAGUGAAACUGGAUGUGAGCAA*mG*mG*mG	CUCCUCGCCCUUGCUCACCA	150	10	30	14
smyhc1:gfp 30 bp insertion pegRNA (long)	mC*mU*mC*CUCGCCCUUGCUCACCAGUUUUAGAGCUAGAAAUAGCAAGUUAAAAUAAGGCUAGUCCGUUAUCAACUUGAAAAAGUGGCACCGAGUCGGUGCUAUAAGUUUGUUCAUCUGUUUUAGUCGCCACCAUGGUGCCUGCUGCUAAGAGAGUGAAACUGGAUGUGAGCAAGGG*mC*mG*mA	CUCCUCGCCCUUGCUCACCA	175	13	30	36
wls 46 bp insertion springRNA	mC*mG*mA*CCAUAAAGGAAAACGCUGUUUUAGAGCUAGAAAUAGCAAGUUAAAAUAAGGCUAGUCCGUUAUCAACUUGAAAAAGUGGCACCGAGUCGGUGCAGUGCCCCAACUGGGGUAACCUUUGAGUUCUCUCAGUUGGGGGCGUGUUUUCCUUU*mA*mU*mG	CGACCAUAAAGGAAAACGCU	155	13	46	0
ror2 3 bp insertion donor DNA (sense)	CAACAGACAAGTGCTGTCCTGCCCAGACGACTGTCCAGCCTGATGGATATACACGATGATGCTAGAGTGCTGGAACGAGTTTC	AUCAUCGUGUAUAUCCAGGC
ror2 3 bp insertion donor DNA (antisense)	GAAACTCGTTCCAGCACTCTAGCATCATCGTGTATATCCATCAGGCTGGACAGTCGTCTGGGCAGGACAGCACTTGTCTGTTG	AUCAUCGUGUAUAUCCAGGC
wls 46 bp insertion donor DNA (+)	TAGCTACTCACCAATCAGCCCTCCGACCATAAAGGAAAACACGCCCCCAACTGAGAGAACTCAAAGGTTACCCCAGTTGGGGCACTGCTTGGAATAACATGAGAATCACTCCCAGAATCACCAACT	CGACCAUAAAGGAAAACGCU
wls 46 bp insertion donor DNA (−)	AGTTGGTGATTCTGGGAGTGATTCTCATGTTATTCCAAGCAGTGCCCCAACTGGGGTAACCTTTGAGTTCTCTCAGTTGGGGGCGTGTTTTCCTTTATGGTCGGAGGGCTGATTGGTGAGTAGCTA	CGACCAUAAAGGAAAACGCU

## Sheet: NGS primers
Supplementary Table 2: Primer sequences for amplicon sequencing
	fwd	rev
Illumina NGS primers	5'- TCGTCGGCAGCGTCAGATGTGTATAAGAGACAG-[gene specific sequence]-3	5'-GTCTCGTGGGCTCG GAGATGTGTATAAGAGACAG-[gene specific sequence]-3‘
gene specific sequences	fwd	rev
ror2	TACGGCCTTCAGCCTTACTG	TTGCTCCTGATGTCTGAGCG
adgrf3b	GTATACATTGAGGCACCTGCAG	CCAGTATCCATTTGTCTTTAAAAGCG
smhyc1	GCCTGTGCTGTTCCTTTTCTC	ACTTGTGGCCGTTTACGTCG
crbn	CAGGCCCATGTGATTAGTTCA	AACTTCCAGCCCATGTGAGA
wls	CTTTGAAAATGGCTGGGGCAA	AGCTACTCACCAATCAGCCC
ror2 off-target 1	ATCTGCCCTTCCCATCGAAC	CCCATCCTCCACTTCGCTTG
ror2 off-target 2	TCACTGGCTGGTTTGCTCTT	ACCACACTCAGCAAGCTTTC
ror2 off-target 3	TCGCTCCATTTCGACCATGT	TGCTGAATACACTAGTCATGCT

## Sheet: CRISPResso
Supplementary Table 3: Parameters of the CRISPResso analysis
target_name	prime_editing_pegRNA_spacer_seq	amplicon_seq	prime_editing_pegRNA_extension_seq	prime_editing_pegRNA_extension_quantification_window_size	plot_window_size	prime_editing_pegRNA_scaffold_min_match_length	min_bp_quality_or_N	assign_ambiguous_alignments_to_first_reference	ignore_substitutions:	prime_editing_pegRNA_scaffold_seq	prime_editing_override_prime_edited_ref_seq
ror2 3 bp insertion pegRNA	ATCATCGTGTATATCCAGGC	TTGCTCCTGATGTCTGAGCGGAGCTGTTGTAGTTGGATAAGCTCTCCCATGTGCGCAATCGTGCGTGGATGTCTTTAAACCGTGGTCTTCTTGAGGGAAACTCGTTCCAGCACTCTAGCATCATCGTGTATATCCAGGCTGGACAGTCGTCTGGGCAGGACAGCACTTGTCTGTTGCGTACCATCTCGATCACATCTTGATTCGAGTAGCCACAGTAAGGCTGAAGGCCGTA	CGACTGTCCAGCCTGATGGATATACACGA	16	30	1	0	TRUE	TRUE	GGCACCGAGUCGGUGC	TTGCTCCTGATGTCTGAGCGGAGCTGTTGTAGTTGGATAAGCTCTCCCATGTGCGCAATCGTGCGTGGATGTCTTTAAACCGTGGTCTTCTTGAGGGAAACTCGTTCCAGCACTCTAGCATCATCGTGTATATCCATCAGGCTGGACAGTCGTCTGGGCAGGACAGCACTTGTCTGTTGCGTACCATCTCGATCACATCTTGATTCGAGTAGCCACAGTAAGGCTGAAGGCCGTA
ror2 3 bp insertion springRNA	ATCATCGTGTATATCCAGGC	TTGCTCCTGATGTCTGAGCGGAGCTGTTGTAGTTGGATAAGCTCTCCCATGTGCGCAATCGTGCGTGGATGTCTTTAAACCGTGGTCTTCTTGAGGGAAACTCGTTCCAGCACTCTAGCATCATCGTGTATATCCAGGCTGGACAGTCGTCTGGGCAGGACAGCACTTGTCTGTTGCGTACCATCTCGATCACATCTTGATTCGAGTAGCCACAGTAAGGCTGAAGGCCGTA	TGATGGATATACACGA	5	30	1	0	TRUE	TRUE	GGCACCGAGUCGGUGC	TTGCTCCTGATGTCTGAGCGGAGCTGTTGTAGTTGGATAAGCTCTCCCATGTGCGCAATCGTGCGTGGATGTCTTTAAACCGTGGTCTTCTTGAGGGAAACTCGTTCCAGCACTCTAGCATCATCGTGTATATCCATCAGGCTGGACAGTCGTCTGGGCAGGACAGCACTTGTCTGTTGCGTACCATCTCGATCACATCTTGATTCGAGTAGCCACAGTAAGGCTGAAGGCCGTA
ror2 substitution	GCCCAGACGACTGTCCAGCC	TACGGCCTTCAGCCTTACTGTGGCTACTCGAATCAAGATGTGATCGAGATGGTACGCAACAGACAAGTGCTGTCCTGCCCAGACGACTGTCCAGCCTGGATATACACGATGATGCTAGAGTGCTGGAACGAGTTTCCCTCAAGAAGACCACGGTTTAAAGACATCCACGCACGATTGCGCACATGGGAGAGCTTATCCAACTACAACAGCTCCGCTCAGACATCAGGAGCAA	ATCGTGTATATTCAGGCTGGACAGTCGTCT	30	40	1	2	TRUE	TRUE	GGCACCGAGUCGGUGC	TACGGCCTTCAGCCTTACTGTGGCTACTCGAATCAAGATGTGATCGAGATGGTACGCAACAGACAAGTGCTGTCCTGCCCAGACGACTGTCCAGCCTGAATATACACGATGATGCTAGAGTGCTGGAACGAGTTTCCCTCAAGAAGACCACGGTTTAAAGACATCCACGCACGATTGCGCACATGGGAGAGCTTATCCAACTACAACAGCTCCGCTCAGACATCAGGAGCAA
adgrf3b 3bp insertion pegRNA	GTGTATGGCAGATGTCCAG	GTATACATTGAGGCACCTGCAGGAAAATTATGCTATAATTCAAGACAACAGCTGAACTGTACCTCTATAGAAGCTATGAGCAAATGTGTATGGCAGATGTCCAGAGGCGACGAAGCGCCATTGACTTTGGGACCAGGGAGTGAAATAATGCTTTCAGATACATGTACAGAAATGTCTGCAGTCACGCTTTTAAAGACAAATGGATACTGGT	GCTTCGTCGCCTCTGAAAGACATCTGCCATA	18	30	1	0	TRUE	TRUE	GGCACCGAGUCGGUGC	GTATACATTGAGGCACCTGCAGGAAAATTATGCTATAATTCAAGACAACAGCTGAACTGTACCTCTATAGAAGCTATGAGCAAATGTGTATGGCAGATGTCTTTCAGAGGCGACGAAGCGCCATTGACTTTGGGACCAGGGAGTGAAATAATGCTTTCAGATACATGTACAGAAATGTCTGCAGTCACGCTTTTAAAGACAAATGGATACTGG
adgrf3b 3bp insertion springRNA	GTGTATGGCAGATGTCCAG	GTATACATTGAGGCACCTGCAGGAAAATTATGCTATAATTCAAGACAACAGCTGAACTGTACCTCTATAGAAGCTATGAGCAAATGTGTATGGCAGATGTCCAGAGGCGACGAAGCGCCATTGACTTTGGGACCAGGGAGTGAAATAATGCTTTCAGATACATGTACAGAAATGTCTGCAGTCACGCTTTTAAAGACAAATGGATACTGGT	AAAGACATCTGCCATA	5	30	1	0	TRUE	TRUE	GGCACCGAGUCGGUGC	GTATACATTGAGGCACCTGCAGGAAAATTATGCTATAATTCAAGACAACAGCTGAACTGTACCTCTATAGAAGCTATGAGCAAATGTGTATGGCAGATGTCTTTCAGAGGCGACGAAGCGCCATTGACTTTGGGACCAGGGAGTGAAATAATGCTTTCAGATACATGTACAGAAATGTCTGCAGTCACGCTTTTAAAGACAAATGGATACTGG
adgrf3b 12bp insertion pegRNA	GTGTATGGCAGATGTCCAG	GTATACATTGAGGCACCTGCAGGAAAATTATGCTATAATTCAAGACAACAGCTGAACTGTACCTCTATAGAAGCTATGAGCAAATGTGTATGGCAGATGTCCAGAGGCGACGAAGCGCCATTGACTTTGGGACCAGGGAGTGAAATAATGCTTTCAGATACATGTACAGAAATGTCTGCAGTCACGCTTTTAAAGACAAATGGATACTGGT	GCTTCGTCGCCTCTGAACAAAGTACTAGACATCTGCCATA	27	30	1	0	TRUE	TRUE	GGCACCGAGUCGGUGC	GTATACATTGAGGCACCTGCAGGAAAATTATGCTATAATTCAAGACAACAGCTGAACTGTACCTCTATAGAAGCTATGAGCAAATGTGTATGGCAGATGTCTAGTACTTTGTTCAGAGGCGACGAAGCGCCATTGACTTTGGGACCAGGGAGTGAAATAATGCTTTCAGATACATGTACAGAAATGTCTGCAGTCACGCTTTTAAAGACAAATGGATACTGG
adgrf3b 12bp insertion springRNA	GTGTATGGCAGATGTCCAG	GTATACATTGAGGCACCTGCAGGAAAATTATGCTATAATTCAAGACAACAGCTGAACTGTACCTCTATAGAAGCTATGAGCAAATGTGTATGGCAGATGTCCAGAGGCGACGAAGCGCCATTGACTTTGGGACCAGGGAGTGAAATAATGCTTTCAGATACATGTACAGAAATGTCTGCAGTCACGCTTTTAAAGACAAATGGATACTGGT	AACAAAGTACTAGACATCTGCCATA	12	30	1	0	TRUE	TRUE	GGCACCGAGUCGGUGC	GTATACATTGAGGCACCTGCAGGAAAATTATGCTATAATTCAAGACAACAGCTGAACTGTACCTCTATAGAAGCTATGAGCAAATGTGTATGGCAGATGTCTAGTACTTTGTTCAGAGGCGACGAAGCGCCATTGACTTTGGGACCAGGGAGTGAAATAATGCTTTCAGATACATGTACAGAAATGTCTGCAGTCACGCTTTTAAAGACAAATGGATACTGG
smhyc1 30bp insertion	CTCCTCGCCCTTGCTCACCA	ACTTGTGGCCGTTTACGTCGCCGTCCAGCTCGACCAGGATGGGCACCACCCCGGTGAACAGCTCCTCGCCCTTGCTCACCATGGTGGCGACTAAAACAGATGAACAAACTTATAAATATAATGTGCTTCTCTGAGAAAAGGAACAGCACAGGC	AGTCGCCACCATGGTGCCTGCTGCTAAGAGAGTGAAACTGGATGTGAGCAAGGG	44	30	1	0	TRUE	TRUE	GGCACCGAGUCGGUGC	ACTTGTGGCCGTTTACGTCGCCGTCCAGCTCGACCAGGATGGGCACCACCCCGGTGAACAGCTCCTCGCCCTTGCTCACATCCAGTTTCACTCTCTTAGCAGCAGGCACCATGGTGGCGACTAAAACAGATGAACAAACTTATAAATATAATGTGCTTCTCTGAGAAAAGGAACAGCACAGGC
crbn substitution	TTTCTTTTCTCAGGTATGCG	CAGGCCCATGTGATTAGTTCAAATTGCTCTCTGAAAATCTCTGGATTTAAACATTCTTTGAAACATTTGTGATAAAGTCAGCAAAATATAGAACACTGTTTTAGTGGTTTTTATTATATATATATAATAATTTTGATGTGATGTGTTTCTTTTCTCAGGTATGCGTGGACGATTGCTCAGTGCAGAACCTGCAGCTCTCACATGGGCTGGAAGTT	AGCAACCGTCCAGGCATACCTGAGAAAA	15	30	1	0	TRUE	TRUE	GGCACCGAGUCGGUGC	CAGGCCCATGTGATTAGTTCAAATTGCTCTCTGAAAATCTCTGGATTTAAACATTCTTTGAAACATTTGTGATAAAGTCAGCAAAATATAGAACACTGTTTTAGTGGTTTTTATTATATATATATAATAATTTTGATGTGATGTGTTTCTTTTCTCAGGTATGCCTGGACGGTTGCTCAGTGCAGAACCTGCAGCTCTCACATGGGCTGGAAGTT
wls 46 bp insertion	CGACCATAAAGGAAAACGCT	AGCTACTCACCAATCAGCCCTCCGACCATAAAGGAAAACGCTTGGAATAACATGAGAATCACTCCCAGAATCACCAACTTTTTGGTGCTCATATTCTCAATAATTGCCCCAGCCATTTTCAAAG	AGTGCCCCAACTGGGGTAACCTTTGAGTTCTCTCAGTTGGGGGCGTGTTTTCCTTTATG	46	40	1	1	TRUE	TRUE	GGCACCGAGUCGGUGC	AGCTACTCACCAATCAGCCCTCCGACCATAAAGGAAAACACGCCCCCAACTGAGAGAACTCAAAGGTTACCCCAGTTGGGGCACTGCTTGGAATAACATGAGAATCACTCCCAGAATCACCAACTTTTTGGTGCTCATATTCTCAATAATTGCCCCAGCCATTTTCAAAG
target_name	guide_seq	amplicon_seq		quantification_window_size					ignore_substitutions
ror2 off-target 1	ATTATCGGAATATCCAGGC	ATCTGCCCTTCCCATCGAACTCTGATTACAATAACCCCCTAAACACCAACTGAGGGGTGGAAGAAAAAAAAAGAAAAGAGAAAAAAAAAACACAACCCAAAATGCCCTTTTTATCTCTTTATAAGAAAAAGACAGATCATTCAATAGGGCTAAAATAGTGGGAGAAGGATAAAAATACATAATTTATCAAGCATATTATCGGAATATCCAGGCGGGCTAATAAAGAGAGTGCGGACTGACTATTCCTTGTCTTATCAAGCGAAGTGGAGGATGGG		10					TRUE
ror2 off-target 2	ATCATCGTGTAAATGCATGC	GATGTCACTGGCTGGTTTGCTCTTAGTCACCAACTCAAACATAAGCATCATCATCATCGCTGCAGATAAACTGATTGCAATATGGACGATTACATCATCAGCGTTGGCTGTTCCGGGCTGTTATTGTTTCTGTGTAAGGTAGTGAGTGTTGATTTAATCATCGTGTAAATGCATGCAGGAAGGAGAGTGTGAGAGAAAGCTTGCTGAGTGTGGTTTGGCTGGA		10					TRUE
ror2 off-target 3	ATCACCGTGCAAATCAAGGC	TCGCTCCATTTCGACCATGTTGAAATGTATTTTTTGTTAAAGAATTTTCATGTATGATATTTCTGTTCAAAATAAATAAATCAAATCAAACTGAAATTAAAGTTCAATTAAATGATTTGTTTTAAATGTACATAATGTCACTTTATGAATAGGGGATAAAGCAGAGGACATCACCGTGCAAATCAAGGCAGGTTTAGCATGACTAGTGTATTCAGCA		10					TRUE
