# Supplementary material for: Optimised genome editing for precise DNA insertion and substitution using prime editors in zebrafish
Source: eLife. 2026 Jul 7;14:RP107475. doi: 10.7554/eLife.107475 (PMC13341114; doi:10.7554/eLife.107475)
Supplement: Supplementary file 2. [file elife-107475-supp2.xlsx]

## Sheet: NGS primers
Supplementary file 2: Primer sequences for amplicon sequencing
	fwd	rev
Illumina NGS primers	5'- TCGTCGGCAGCGTCAGATGTGTATAAGAGACAG-[gene specific sequence]-3	5'-GTCTCGTGGGCTCG GAGATGTGTATAAGAGACAG-[gene specific sequence]-3‘
gene specific sequences	fwd	rev
ror2	TACGGCCTTCAGCCTTACTG	TTGCTCCTGATGTCTGAGCG
adgrf3b	GTATACATTGAGGCACCTGCAG	CCAGTATCCATTTGTCTTTAAAAGCG
smhyc1	GCCTGTGCTGTTCCTTTTCTC	ACTTGTGGCCGTTTACGTCG
crbn	CAGGCCCATGTGATTAGTTCA	AACTTCCAGCCCATGTGAGA
wls	CTTTGAAAATGGCTGGGGCAA	AGCTACTCACCAATCAGCCC
ror2 off-target 1	ATCTGCCCTTCCCATCGAAC	CCCATCCTCCACTTCGCTTG
ror2 off-target 2	TCACTGGCTGGTTTGCTCTT	ACCACACTCAGCAAGCTTTC
ror2 off-target 3	TCGCTCCATTTCGACCATGT	TGCTGAATACACTAGTCATGCT
