# Supplementary material for: Optimised genome editing for precise DNA insertion and substitution using prime editors in zebrafish
Source: eLife. 2026 Jul 7;14:RP107475. doi: 10.7554/eLife.107475 (PMC13341114; doi:10.7554/eLife.107475)
Supplement: Supplementary file 3. [file elife-107475-supp3.xlsx]

## Sheet: CRISPResso
Supplementary file 3: Parameters of the CRISPResso analysis
target_name	prime_editing_pegRNA_spacer_seq	amplicon_seq	prime_editing_pegRNA_extension_seq	prime_editing_pegRNA_extension_quantification_window_size	plot_window_size	prime_editing_pegRNA_scaffold_min_match_length	min_bp_quality_or_N	assign_ambiguous_alignments_to_first_reference	ignore_substitutions:	prime_editing_pegRNA_scaffold_seq	prime_editing_override_prime_edited_ref_seq
ror2 3 bp insertion pegRNA	ATCATCGTGTATATCCAGGC	TTGCTCCTGATGTCTGAGCGGAGCTGTTGTAGTTGGATAAGCTCTCCCATGTGCGCAATCGTGCGTGGATGTCTTTAAACCGTGGTCTTCTTGAGGGAAACTCGTTCCAGCACTCTAGCATCATCGTGTATATCCAGGCTGGACAGTCGTCTGGGCAGGACAGCACTTGTCTGTTGCGTACCATCTCGATCACATCTTGATTCGAGTAGCCACAGTAAGGCTGAAGGCCGTA	CGACTGTCCAGCCTGATGGATATACACGA	16	30	1	0	TRUE	TRUE	GGCACCGAGUCGGUGC	TTGCTCCTGATGTCTGAGCGGAGCTGTTGTAGTTGGATAAGCTCTCCCATGTGCGCAATCGTGCGTGGATGTCTTTAAACCGTGGTCTTCTTGAGGGAAACTCGTTCCAGCACTCTAGCATCATCGTGTATATCCATCAGGCTGGACAGTCGTCTGGGCAGGACAGCACTTGTCTGTTGCGTACCATCTCGATCACATCTTGATTCGAGTAGCCACAGTAAGGCTGAAGGCCGTA
ror2 3 bp insertion springRNA	ATCATCGTGTATATCCAGGC	TTGCTCCTGATGTCTGAGCGGAGCTGTTGTAGTTGGATAAGCTCTCCCATGTGCGCAATCGTGCGTGGATGTCTTTAAACCGTGGTCTTCTTGAGGGAAACTCGTTCCAGCACTCTAGCATCATCGTGTATATCCAGGCTGGACAGTCGTCTGGGCAGGACAGCACTTGTCTGTTGCGTACCATCTCGATCACATCTTGATTCGAGTAGCCACAGTAAGGCTGAAGGCCGTA	TGATGGATATACACGA	5	30	1	0	TRUE	TRUE	GGCACCGAGUCGGUGC	TTGCTCCTGATGTCTGAGCGGAGCTGTTGTAGTTGGATAAGCTCTCCCATGTGCGCAATCGTGCGTGGATGTCTTTAAACCGTGGTCTTCTTGAGGGAAACTCGTTCCAGCACTCTAGCATCATCGTGTATATCCATCAGGCTGGACAGTCGTCTGGGCAGGACAGCACTTGTCTGTTGCGTACCATCTCGATCACATCTTGATTCGAGTAGCCACAGTAAGGCTGAAGGCCGTA
ror2 substitution	GCCCAGACGACTGTCCAGCC	TACGGCCTTCAGCCTTACTGTGGCTACTCGAATCAAGATGTGATCGAGATGGTACGCAACAGACAAGTGCTGTCCTGCCCAGACGACTGTCCAGCCTGGATATACACGATGATGCTAGAGTGCTGGAACGAGTTTCCCTCAAGAAGACCACGGTTTAAAGACATCCACGCACGATTGCGCACATGGGAGAGCTTATCCAACTACAACAGCTCCGCTCAGACATCAGGAGCAA	ATCGTGTATATTCAGGCTGGACAGTCGTCT	30	40	1	2	TRUE	TRUE	GGCACCGAGUCGGUGC	TACGGCCTTCAGCCTTACTGTGGCTACTCGAATCAAGATGTGATCGAGATGGTACGCAACAGACAAGTGCTGTCCTGCCCAGACGACTGTCCAGCCTGAATATACACGATGATGCTAGAGTGCTGGAACGAGTTTCCCTCAAGAAGACCACGGTTTAAAGACATCCACGCACGATTGCGCACATGGGAGAGCTTATCCAACTACAACAGCTCCGCTCAGACATCAGGAGCAA
adgrf3b 3bp insertion pegRNA	GTGTATGGCAGATGTCCAG	GTATACATTGAGGCACCTGCAGGAAAATTATGCTATAATTCAAGACAACAGCTGAACTGTACCTCTATAGAAGCTATGAGCAAATGTGTATGGCAGATGTCCAGAGGCGACGAAGCGCCATTGACTTTGGGACCAGGGAGTGAAATAATGCTTTCAGATACATGTACAGAAATGTCTGCAGTCACGCTTTTAAAGACAAATGGATACTGGT	GCTTCGTCGCCTCTGAAAGACATCTGCCATA	18	30	1	0	TRUE	TRUE	GGCACCGAGUCGGUGC	GTATACATTGAGGCACCTGCAGGAAAATTATGCTATAATTCAAGACAACAGCTGAACTGTACCTCTATAGAAGCTATGAGCAAATGTGTATGGCAGATGTCTTTCAGAGGCGACGAAGCGCCATTGACTTTGGGACCAGGGAGTGAAATAATGCTTTCAGATACATGTACAGAAATGTCTGCAGTCACGCTTTTAAAGACAAATGGATACTGG
adgrf3b 3bp insertion springRNA	GTGTATGGCAGATGTCCAG	GTATACATTGAGGCACCTGCAGGAAAATTATGCTATAATTCAAGACAACAGCTGAACTGTACCTCTATAGAAGCTATGAGCAAATGTGTATGGCAGATGTCCAGAGGCGACGAAGCGCCATTGACTTTGGGACCAGGGAGTGAAATAATGCTTTCAGATACATGTACAGAAATGTCTGCAGTCACGCTTTTAAAGACAAATGGATACTGGT	AAAGACATCTGCCATA	5	30	1	0	TRUE	TRUE	GGCACCGAGUCGGUGC	GTATACATTGAGGCACCTGCAGGAAAATTATGCTATAATTCAAGACAACAGCTGAACTGTACCTCTATAGAAGCTATGAGCAAATGTGTATGGCAGATGTCTTTCAGAGGCGACGAAGCGCCATTGACTTTGGGACCAGGGAGTGAAATAATGCTTTCAGATACATGTACAGAAATGTCTGCAGTCACGCTTTTAAAGACAAATGGATACTGG
adgrf3b 12bp insertion pegRNA	GTGTATGGCAGATGTCCAG	GTATACATTGAGGCACCTGCAGGAAAATTATGCTATAATTCAAGACAACAGCTGAACTGTACCTCTATAGAAGCTATGAGCAAATGTGTATGGCAGATGTCCAGAGGCGACGAAGCGCCATTGACTTTGGGACCAGGGAGTGAAATAATGCTTTCAGATACATGTACAGAAATGTCTGCAGTCACGCTTTTAAAGACAAATGGATACTGGT	GCTTCGTCGCCTCTGAACAAAGTACTAGACATCTGCCATA	27	30	1	0	TRUE	TRUE	GGCACCGAGUCGGUGC	GTATACATTGAGGCACCTGCAGGAAAATTATGCTATAATTCAAGACAACAGCTGAACTGTACCTCTATAGAAGCTATGAGCAAATGTGTATGGCAGATGTCTAGTACTTTGTTCAGAGGCGACGAAGCGCCATTGACTTTGGGACCAGGGAGTGAAATAATGCTTTCAGATACATGTACAGAAATGTCTGCAGTCACGCTTTTAAAGACAAATGGATACTGG
adgrf3b 12bp insertion springRNA	GTGTATGGCAGATGTCCAG	GTATACATTGAGGCACCTGCAGGAAAATTATGCTATAATTCAAGACAACAGCTGAACTGTACCTCTATAGAAGCTATGAGCAAATGTGTATGGCAGATGTCCAGAGGCGACGAAGCGCCATTGACTTTGGGACCAGGGAGTGAAATAATGCTTTCAGATACATGTACAGAAATGTCTGCAGTCACGCTTTTAAAGACAAATGGATACTGGT	AACAAAGTACTAGACATCTGCCATA	12	30	1	0	TRUE	TRUE	GGCACCGAGUCGGUGC	GTATACATTGAGGCACCTGCAGGAAAATTATGCTATAATTCAAGACAACAGCTGAACTGTACCTCTATAGAAGCTATGAGCAAATGTGTATGGCAGATGTCTAGTACTTTGTTCAGAGGCGACGAAGCGCCATTGACTTTGGGACCAGGGAGTGAAATAATGCTTTCAGATACATGTACAGAAATGTCTGCAGTCACGCTTTTAAAGACAAATGGATACTGG
smhyc1 30bp insertion	CTCCTCGCCCTTGCTCACCA	ACTTGTGGCCGTTTACGTCGCCGTCCAGCTCGACCAGGATGGGCACCACCCCGGTGAACAGCTCCTCGCCCTTGCTCACCATGGTGGCGACTAAAACAGATGAACAAACTTATAAATATAATGTGCTTCTCTGAGAAAAGGAACAGCACAGGC	AGTCGCCACCATGGTGCCTGCTGCTAAGAGAGTGAAACTGGATGTGAGCAAGGG	44	30	1	0	TRUE	TRUE	GGCACCGAGUCGGUGC	ACTTGTGGCCGTTTACGTCGCCGTCCAGCTCGACCAGGATGGGCACCACCCCGGTGAACAGCTCCTCGCCCTTGCTCACATCCAGTTTCACTCTCTTAGCAGCAGGCACCATGGTGGCGACTAAAACAGATGAACAAACTTATAAATATAATGTGCTTCTCTGAGAAAAGGAACAGCACAGGC
crbn substitution	TTTCTTTTCTCAGGTATGCG	CAGGCCCATGTGATTAGTTCAAATTGCTCTCTGAAAATCTCTGGATTTAAACATTCTTTGAAACATTTGTGATAAAGTCAGCAAAATATAGAACACTGTTTTAGTGGTTTTTATTATATATATATAATAATTTTGATGTGATGTGTTTCTTTTCTCAGGTATGCGTGGACGATTGCTCAGTGCAGAACCTGCAGCTCTCACATGGGCTGGAAGTT	AGCAACCGTCCAGGCATACCTGAGAAAA	15	30	1	0	TRUE	TRUE	GGCACCGAGUCGGUGC	CAGGCCCATGTGATTAGTTCAAATTGCTCTCTGAAAATCTCTGGATTTAAACATTCTTTGAAACATTTGTGATAAAGTCAGCAAAATATAGAACACTGTTTTAGTGGTTTTTATTATATATATATAATAATTTTGATGTGATGTGTTTCTTTTCTCAGGTATGCCTGGACGGTTGCTCAGTGCAGAACCTGCAGCTCTCACATGGGCTGGAAGTT
wls 46 bp insertion	CGACCATAAAGGAAAACGCT	AGCTACTCACCAATCAGCCCTCCGACCATAAAGGAAAACGCTTGGAATAACATGAGAATCACTCCCAGAATCACCAACTTTTTGGTGCTCATATTCTCAATAATTGCCCCAGCCATTTTCAAAG	AGTGCCCCAACTGGGGTAACCTTTGAGTTCTCTCAGTTGGGGGCGTGTTTTCCTTTATG	46	40	1	1	TRUE	TRUE	GGCACCGAGUCGGUGC	AGCTACTCACCAATCAGCCCTCCGACCATAAAGGAAAACACGCCCCCAACTGAGAGAACTCAAAGGTTACCCCAGTTGGGGCACTGCTTGGAATAACATGAGAATCACTCCCAGAATCACCAACTTTTTGGTGCTCATATTCTCAATAATTGCCCCAGCCATTTTCAAAG
target_name	guide_seq	amplicon_seq		quantification_window_size					ignore_substitutions
ror2 off-target 1	ATTATCGGAATATCCAGGC	ATCTGCCCTTCCCATCGAACTCTGATTACAATAACCCCCTAAACACCAACTGAGGGGTGGAAGAAAAAAAAAGAAAAGAGAAAAAAAAAACACAACCCAAAATGCCCTTTTTATCTCTTTATAAGAAAAAGACAGATCATTCAATAGGGCTAAAATAGTGGGAGAAGGATAAAAATACATAATTTATCAAGCATATTATCGGAATATCCAGGCGGGCTAATAAAGAGAGTGCGGACTGACTATTCCTTGTCTTATCAAGCGAAGTGGAGGATGGG		10					TRUE
ror2 off-target 2	ATCATCGTGTAAATGCATGC	GATGTCACTGGCTGGTTTGCTCTTAGTCACCAACTCAAACATAAGCATCATCATCATCGCTGCAGATAAACTGATTGCAATATGGACGATTACATCATCAGCGTTGGCTGTTCCGGGCTGTTATTGTTTCTGTGTAAGGTAGTGAGTGTTGATTTAATCATCGTGTAAATGCATGCAGGAAGGAGAGTGTGAGAGAAAGCTTGCTGAGTGTGGTTTGGCTGGA		10					TRUE
ror2 off-target 3	ATCACCGTGCAAATCAAGGC	TCGCTCCATTTCGACCATGTTGAAATGTATTTTTTGTTAAAGAATTTTCATGTATGATATTTCTGTTCAAAATAAATAAATCAAATCAAACTGAAATTAAAGTTCAATTAAATGATTTGTTTTAAATGTACATAATGTCACTTTATGAATAGGGGATAAAGCAGAGGACATCACCGTGCAAATCAAGGCAGGTTTAGCATGACTAGTGTATTCAGCA		10					TRUE
