# Supplementary figures and images for: Optimised genome editing for precise DNA insertion and substitution using Prime Editors in zebrafish
Source: eLife journal article supplement (doi:10.7554/elife.107475), 2025-08-18

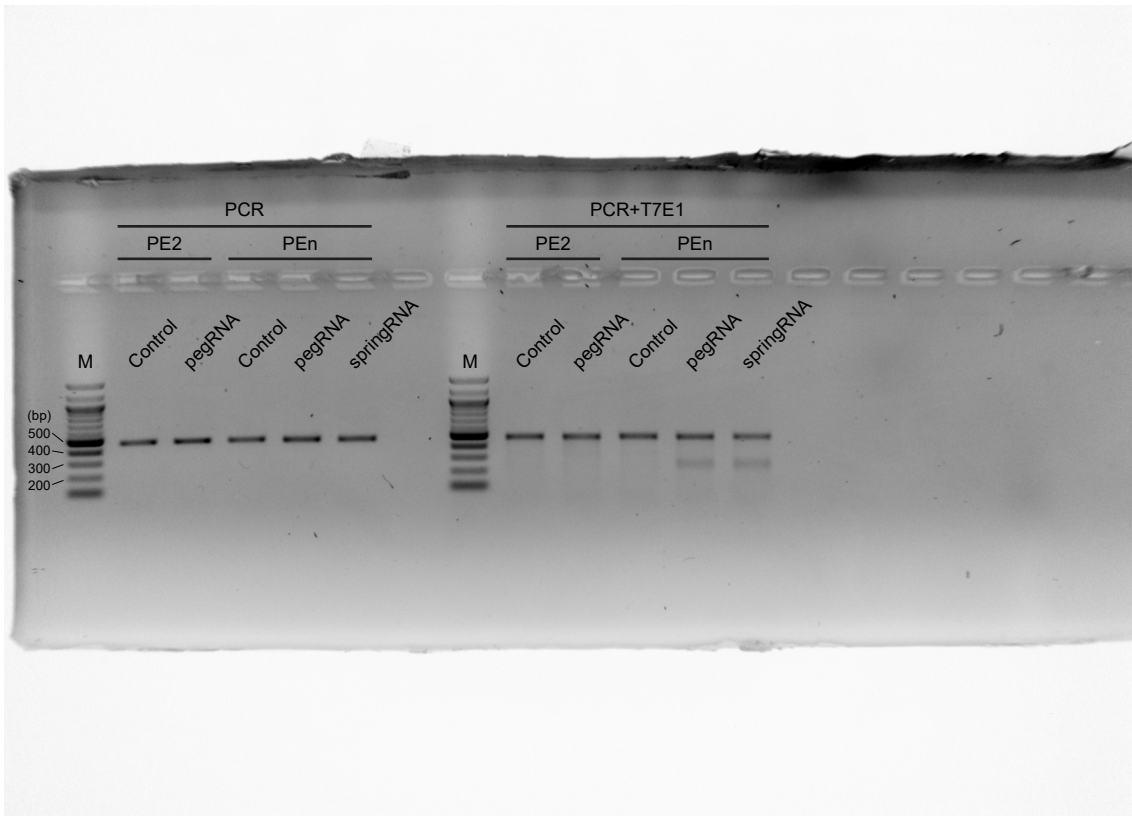

Figure 2, Source data 1. Original agarose gel image corresponding to Figure 2, panel D. M, DNA marker.

Supplement: fig2-data1 [file Figure 2_Source data 1.pdf › Figure 2_Source data 1.pdf]
